# Supplementary material for: Improving the Quality of Adult Mortality Data Collected in Demographic Surveys: Validation Study of a New Siblings' Survival Questionnaire in Niakhar, Senegal
Source: PubMed Central journal article supplement (PMC4035258; doi:10.1371/journal.pmed.1001652), 2014-05-27
Supplement: pmed.1001652.s006.pdf [file pmed.1001652.s006.pdf]

## IDENTIFICATION

VILLE/VILLAGE: \_\_\_\_\_ HAMEAU/QUARTIER: \_\_\_\_\_

CHEF DE CONCESSION \_\_\_\_\_ | | | | | | | | | |

ENQUETE(E): \_\_\_\_\_ | | | | | | | | | |

CONJOINT: \_\_\_\_\_ | | | | | | | | | |

PERE: \_\_\_\_\_ | | | | | | | | | |

MERE: \_\_\_\_\_ | | | | | | | | | |

| VISITE | DATE | ENQUETEUR | RESULTAT* | LANGUE** | RDV | SAISIE |
|--------|------|-----------|-----------|----------|-----|--------|
| 1      |      |           |           |          |     |        |
| 2      |      |           |           |          |     |        |
| 3      |      |           |           |          |     |        |

\* CODE RESULTAT : 1 = Rempli, 2 = Pas a la maison, 3 = différé, 4 = Refus, 5 = Partiel, 6 = Incapacité, 7 = autre (préciser)

\*\* CODE LANGUE: 1 = Serer, 2 = Wolof, 3 = autre (préciser); cela fait référence a la langue de l'entretien, pas a la langue du questionnaire.

## CARACTERISTIQUES SOCIODEMOGRAPHIQUES DE L'ENQUETE(E)

101. HEURE DE DEBUT: | | : | | : | |

|      |                                                                                                                                                                         |                                                                                                                                             |
|------|-------------------------------------------------------------------------------------------------------------------------------------------------------------------------|---------------------------------------------------------------------------------------------------------------------------------------------|
| 102. | En quels mois et année êtes-vous né(e)?<br>"98" si connaît pas le mois, "9998" pour l'année                                                                             | MOIS:        <br>ANNEE:                                                                                                                     |
| 103. | Quel age aviez-vous a votre dernier anniversaire?                                                                                                                       | AGE EN ANNEES REVOLUES:                                                                                                                     |
| 104. | Etes-vous allé(e) a l'école?                                                                                                                                            | OUI 1<br>NON 2 (→ 106)                                                                                                                      |
| 105. | Quel est le plus haut niveau d'études que vous avez atteint?                                                                                                            | ELEMENTAIRE 1<br>MOYEN 2 (→ 111)<br>SECONDAIRE 3 (→ 111)<br>SUPERIEUR 4 (→ 111)<br>AUTRE( ) 5 (→ 111)                                       |
| 106. | Avez-vous déjà participé a un programme d'alphabétisation ou a un autre programme qui comprenait l'apprentissage de la lecture et de l'écriture (primaire non compris)? | OUI 1<br>NON 2 (→ 111)                                                                                                                      |
| 108. | Dans quelles langues étaient données les programmes d'alphabétisation auxquels vous avez participés?<br><i>Enregistrez tout ce qui est mentionné.</i>                   | ARABE/MEDERSA A<br>WOLOF B<br>SERER C<br>AUTRE( ) D                                                                                         |
| 111. | Quelle est votre religion?                                                                                                                                              | MUSULMAN 1<br>CHRETIEN 2<br>ANIMISTE 3<br>SANS RELIGION 4<br>AUTRE( ) 5                                                                     |
| 112. | Quelle est votre ethnie?                                                                                                                                                | SERER 1<br>WOLOF 2<br>AUTRE( ) 5                                                                                                            |
| 113. | Est-ce que vous parlez suffisamment bien les langues suivantes?                                                                                                         | <b>SERER</b> <b>WOLOF</b> <b>FRANCAIS</b><br>1 = OUI      1 = OUI      1 = OUI<br>2 = NON      2 = NON      2 = NON                         |
| 114. | Quand avez-vous eu une conversation en _____ pour la dernière fois?<br>(1 = aujourd'hui, 2 = dans la semaine, 3 = > 1 semaine, 4 = ne sait plus, 98 = jamais)           | <b>SERER</b> <b>WOLOF</b> <b>FRANCAIS</b><br>1      1      1<br>2      2      2<br>3      3      3<br>4      4      4<br>98      98      98 |

**CALENDRIER DES FRERES ET DES SŒURS**  
**INSTRUCTIONS POUR L'ENQUETEUR**

| <b>1ERE ETAPE : CALENDRIER DE L'ENQUETE(E) (P.4)</b>                                                                                                                                                                                     |       |
|------------------------------------------------------------------------------------------------------------------------------------------------------------------------------------------------------------------------------------------|-------|
| 1. Introduire le calendrier a l'enquêté(e) en utilisant la formulation suivante : « serigne (soxna ci) doma bougon niou waxtan ci xew xew yi gana feuss si sa doundou wala sa diar-diar mo xam. Figa moussa deuk, - seuil, wala diang ». | _____ |
| 2. Amorcer le calendrier de l'enquêté(e) en inscrivant dans le champ "naissance(s)" la date de naissance de l'enquêté(e) obtenue en Q102 et/ou Q103.                                                                                     | _____ |
| 3. Aborder les différents champs avec l'enquêté(e) en commençant par les évènements                                                                                                                                                      | _____ |
| <b>2EME ETAPE : LISTE DES FRERES ET SOEURS (P.3)</b>                                                                                                                                                                                     |       |
| 1. Obtenir la liste des frères et sœurs en suivant les procédures                                                                                                                                                                        | _____ |
| <b>3EME ETAPE : CALENDRIER DES FRERES ET SOEURS (P.5)</b>                                                                                                                                                                                |       |
| 1. Ordonner la liste des frères et sœurs selon le rang de naissance                                                                                                                                                                      | _____ |
| 2. Incrire les prénoms et obtenir le sexe de tous les frères et sœurs                                                                                                                                                                    | _____ |
| 3. Obtenir des informations sur les âges, la survie et les dates de décès des frères et sœurs.                                                                                                                                           | _____ |
| 4. Calculer l'âge au décès de chaque frère et sœur (NA, si le frère ou la sœur sont toujours en vie)                                                                                                                                     | _____ |
| 5. Vérifier les intervalles de naissance entre les frères et sœurs, relancer sur les intervalles longs (> 4 ans)                                                                                                                         | _____ |

## LISTE DES FRERES ET SOEURS DE L'ENQUETE(E)

Maintenant, je voudrais vous poser des questions sur vos frères et sœurs, c'est-à-dire sur tous les enfants nés de votre mère biologique. Pourriez-vous me donner la liste de tous vos frères et sœurs de même mère biologique? Dans l'ordre où ils vous viennent à l'esprit.

|             |              |
|-------------|--------------|
| FS1 : _____ | FS8 : _____  |
| FS2 : _____ | FS9 : _____  |
| FS3 : _____ | FS10 : _____ |
| FS4 : _____ | FS11 : _____ |
| FS5 : _____ | FS12 : _____ |
| FS6 : _____ | FS13 : _____ |
| FS7 : _____ | FS14 : _____ |

*Relire la liste en partant du dernier frère/soeur mentionné(e) puis lui demander: " y'a-t-il d'autres frères et/ou sœurs que vous n'avez pas mentionnés ?"*

|            |            |
|------------|------------|
| NS1: _____ | NS3: _____ |
| NS2: _____ | NS4: _____ |

**Aide-mémoire:** Au cours d'enquêtes précédentes, nous nous sommes rendus compte que beaucoup de gens oublient de mentionner certains de leurs frères et sœurs, même s'ils ont l'impression d'avoir mentionné tout le monde. Les questions que je vais vous poser maintenant visent à vous aider à vous rappeler de vos frères et sœurs que vous avez peut-être oublié de me déclarer.

**1. Résidence:** J'ai ici une liste d'endroits où les gens de ce village migrent fréquemment, soit parce qu'ils y travaillent, ou parce qu'ils se sont mariés là-bas. Est-ce que certains de vos frères et sœurs, **que vous n'avez pas mentionnés jusqu'à présent**, ont migré vers ces endroits? 1 = Niakhar, 2 = Ngoye/Bambeye, 3 = le diakhao, 4 = Fatick, 5 = Mbour, 6 = Dakar et sa région, 7 = Thies, 8 = Kaolack, 9 = Koupentoum, 10 = Casamance, 11 = ailleurs.

|            |            |
|------------|------------|
| MG1: _____ | MG3: _____ |
| MG2: _____ | MG4: _____ |

**2. Statut vital:** parfois, on peut aussi oublier de mentionner une frère ou une soeur car il/elle est décédé. Je sais qu'il peut être douloureux de se souvenir du décès d'un proche, mais est-ce qu'il y a des frères/sœurs, décédés **que vous n'avez pas mentionnés jusqu'à présent**?

|            |            |
|------------|------------|
| SV1: _____ | SV3: _____ |
| SV2: _____ | SV4: _____ |

**3. Proximité:** parfois, on peut aussi oublier de mentionner un frère ou une soeur car on les a peu connus ou on les côtoie peu souvent. Par exemple, peut-être avez-vous des frères/sœurs qui sont nés bien avant ou après vous et qui n'ont pas vécu longtemps avec vous? Ou d'autres avec qui vous avez peu de relations?

|            |            |
|------------|------------|
| PR1: _____ | PR3: _____ |
| PR2: _____ | PR4: _____ |

**4. Père biologique:** enfin, on peut aussi oublier de mentionner un frère ou soeur car ils sont issus d'une autre union, c'est-à-dire qu'ils ont la même mère biologique, mais pas le même père biologique que nous. Est-ce qu'il y a des frères et sœurs, d'un autre père biologique, **que vous n'avez pas mentionnés jusqu'à présent** ?

|            |            |
|------------|------------|
| PB1: _____ | PB3: _____ |
| PB2: _____ | PB4: _____ |

**Pour récapituler**, en tout, votre mère a eu \_\_\_\_ enfants, dont vous.

| ANNEE | DUREE | EVENEMENTS NATIONAUX<br>OU PERSONNELS | ENQUETE(E)                                                            |                                                                                |           |       |
|-------|-------|---------------------------------------|-----------------------------------------------------------------------|--------------------------------------------------------------------------------|-----------|-------|
|       |       |                                       | NAISSANCE(S)<br><i>Enquete(e) = N</i><br>Enfants de l'enq,<br>=prenom | UNION(S)<br><i>DV = divorce</i><br><i>SP= separation</i><br><i>V = veuvage</i> | RESIDENCE | ECOLE |
| 1953  | 60    |                                       |                                                                       |                                                                                |           |       |
| 1954  | 59    |                                       |                                                                       |                                                                                |           |       |
| 1955  | 58    |                                       |                                                                       |                                                                                |           |       |
| 1956  | 57    |                                       |                                                                       |                                                                                |           |       |
| 1957  | 56    |                                       |                                                                       |                                                                                |           |       |
| 1958  | 55    |                                       |                                                                       |                                                                                |           |       |
| 1959  | 54    |                                       |                                                                       |                                                                                |           |       |
| 1960  | 53    | <i>Indépendance</i>                   |                                                                       |                                                                                |           |       |
| 1961  | 52    |                                       |                                                                       |                                                                                |           |       |
| 1962  | 51    |                                       |                                                                       |                                                                                |           |       |
| 1963  | 50    |                                       |                                                                       |                                                                                |           |       |
| 1964  | 49    |                                       |                                                                       |                                                                                |           |       |
| 1965  | 48    |                                       |                                                                       |                                                                                |           |       |
| 1966  | 47    |                                       |                                                                       |                                                                                |           |       |
| 1967  | 46    |                                       |                                                                       |                                                                                |           |       |
| 1968  | 45    | <i>Grève étud.</i>                    |                                                                       |                                                                                |           |       |
| 1969  | 44    | <i>Décès M'BACKE</i>                  |                                                                       |                                                                                |           |       |
| 1970  | 43    |                                       |                                                                       |                                                                                |           |       |
| 1971  | 42    |                                       |                                                                       |                                                                                |           |       |
| 1972  | 41    |                                       |                                                                       |                                                                                |           |       |
| 1973  | 40    | <i>Sécheresse</i>                     |                                                                       |                                                                                |           |       |
| 1974  | 39    | <i>Création PDS</i>                   |                                                                       |                                                                                |           |       |
| 1975  | 38    |                                       |                                                                       |                                                                                |           |       |
| 1976  | 37    |                                       |                                                                       |                                                                                |           |       |
| 1977  | 36    |                                       |                                                                       |                                                                                |           |       |
| 1978  | 35    | <i>SENGHOR réélu</i>                  |                                                                       |                                                                                |           |       |
| 1979  | 34    |                                       |                                                                       |                                                                                |           |       |
| 1980  | 33    |                                       |                                                                       |                                                                                |           |       |
| 1981  | 32    | <i>A. DIOUF prés.</i>                 |                                                                       |                                                                                |           |       |
| 1982  | 31    |                                       |                                                                       |                                                                                |           |       |
| 1983  | 30    | <i>A. DIOUF élu</i>                   |                                                                       |                                                                                |           |       |
| 1984  | 29    |                                       |                                                                       |                                                                                |           |       |
| 1985  | 28    |                                       |                                                                       |                                                                                |           |       |
| 1986  | 27    |                                       |                                                                       |                                                                                |           |       |
| 1987  | 26    |                                       |                                                                       |                                                                                |           |       |
| 1988  | 25    | <i>Année blanche</i>                  |                                                                       |                                                                                |           |       |
| 1989  | 24    | <i>Evèn. Maur-SN</i>                  |                                                                       |                                                                                |           |       |
| 1990  | 23    |                                       |                                                                       |                                                                                |           |       |
| 1991  | 22    | <i>Décès A.LAHAD</i>                  |                                                                       |                                                                                |           |       |
| 1992  | 21    | <i>Acc. SONACOS</i>                   |                                                                       |                                                                                |           |       |
| 1993  | 20    | <i>Elections</i>                      |                                                                       |                                                                                |           |       |
| 1994  | 19    |                                       |                                                                       |                                                                                |           |       |
| 1995  | 18    |                                       |                                                                       |                                                                                |           |       |
| 1996  | 17    |                                       |                                                                       |                                                                                |           |       |
| 1997  | 16    | <i>Décès DABAKH</i>                   |                                                                       |                                                                                |           |       |
| 1998  | 15    |                                       |                                                                       |                                                                                |           |       |
| 1999  | 14    |                                       |                                                                       |                                                                                |           |       |
| 2000  | 13    | <i>A.WADE élu</i>                     |                                                                       |                                                                                |           |       |
| 2001  | 12    | <i>11 SEPT</i>                        |                                                                       |                                                                                |           |       |
| 2002  | 11    | <i>Joola</i>                          |                                                                       |                                                                                |           |       |
| 2003  | 10    |                                       |                                                                       |                                                                                |           |       |
| 2004  | 9     | <i>Deces Card. Thiandoum</i>          |                                                                       |                                                                                |           |       |
| 2005  | 8     |                                       |                                                                       |                                                                                |           |       |
| 2006  | 7     |                                       |                                                                       |                                                                                |           |       |
| 2007  | 6     | <i>WADE réélu</i>                     |                                                                       |                                                                                |           |       |
| 2008  | 5     | <i>B. OBAMA élu</i>                   |                                                                       |                                                                                |           |       |
| 2009  | 4     | <i>Décès S.SALIOU</i>                 |                                                                       |                                                                                |           |       |
| 2010  | 3     | <i>Décès Y.K SENE</i>                 |                                                                       |                                                                                |           |       |
| 2011  | 2     |                                       |                                                                       |                                                                                |           |       |
| 2012  | 1     | <i>M. SALL élu</i>                    |                                                                       |                                                                                |           |       |
| 2013  | 0     |                                       |                                                                       |                                                                                |           |       |

| ANNEE    | DUREE | FRERES & SŒURS |         |         |         |         |         |         |         |         |    |
|----------|-------|----------------|---------|---------|---------|---------|---------|---------|---------|---------|----|
|          |       | #1             | #2      | #3      | #4      | #5      | #6      | #7      | #8      | #9      |    |
|          |       | M F NSP        | M F NSP | M F NSP | M F NSP | M F NSP | M F NSP | M F NSP | M F NSP | M F NSP |    |
| Avt.     | >     |                |         |         |         |         |         |         |         |         |    |
| 1953     | 60    |                |         |         |         |         |         |         |         |         |    |
| 1954     | 59    |                |         |         |         |         |         |         |         |         |    |
| 1955     | 58    |                |         |         |         |         |         |         |         |         |    |
| 1956     | 57    |                |         |         |         |         |         |         |         |         |    |
| 1957     | 56    |                |         |         |         |         |         |         |         |         |    |
| 1958     | 55    |                |         |         |         |         |         |         |         |         |    |
| 1959     | 54    |                |         |         |         |         |         |         |         |         |    |
| 1960     | 53    |                |         |         |         |         |         |         |         |         |    |
| 1961     | 52    |                |         |         |         |         |         |         |         |         |    |
| 1962     | 51    |                |         |         |         |         |         |         |         |         |    |
| 1963     | 50    |                |         |         |         |         |         |         |         |         |    |
| 1964     | 49    |                |         |         |         |         |         |         |         |         |    |
| 1965     | 48    |                |         |         |         |         |         |         |         |         |    |
| 1966     | 47    |                |         |         |         |         |         |         |         |         |    |
| 1967     | 46    |                |         |         |         |         |         |         |         |         |    |
| 1968     | 45    |                |         |         |         |         |         |         |         |         |    |
| 1969     | 44    |                |         |         |         |         |         |         |         |         |    |
| 1970     | 43    |                |         |         |         |         |         |         |         |         |    |
| 1971     | 42    |                |         |         |         |         |         |         |         |         |    |
| 1972     | 41    |                |         |         |         |         |         |         |         |         |    |
| 1973     | 40    |                |         |         |         |         |         |         |         |         |    |
| 1974     | 39    |                |         |         |         |         |         |         |         |         |    |
| 1975     | 38    |                |         |         |         |         |         |         |         |         |    |
| 1976     | 37    |                |         |         |         |         |         |         |         |         |    |
| 1977     | 36    |                |         |         |         |         |         |         |         |         |    |
| 1978     | 35    |                |         |         |         |         |         |         |         |         |    |
| 1979     | 34    |                |         |         |         |         |         |         |         |         |    |
| 1980     | 33    |                |         |         |         |         |         |         |         |         |    |
| 1981     | 32    |                |         |         |         |         |         |         |         |         |    |
| 1982     | 31    |                |         |         |         |         |         |         |         |         |    |
| 1983     | 30    |                |         |         |         |         |         |         |         |         |    |
| 1984     | 29    |                |         |         |         |         |         |         |         |         |    |
| 1985     | 28    |                |         |         |         |         |         |         |         |         |    |
| 1986     | 27    |                |         |         |         |         |         |         |         |         |    |
| 1987     | 26    |                |         |         |         |         |         |         |         |         |    |
| 1988     | 25    |                |         |         |         |         |         |         |         |         |    |
| 1989     | 24    |                |         |         |         |         |         |         |         |         |    |
| 1990     | 23    |                |         |         |         |         |         |         |         |         |    |
| 1991     | 22    |                |         |         |         |         |         |         |         |         |    |
| 1992     | 21    |                |         |         |         |         |         |         |         |         |    |
| 1993     | 20    |                |         |         |         |         |         |         |         |         |    |
| 1994     | 19    |                |         |         |         |         |         |         |         |         |    |
| 1995     | 18    |                |         |         |         |         |         |         |         |         |    |
| 1996     | 17    |                |         |         |         |         |         |         |         |         |    |
| 1997     | 16    |                |         |         |         |         |         |         |         |         |    |
| 1998     | 15    |                |         |         |         |         |         |         |         |         |    |
| 1999     | 14    |                |         |         |         |         |         |         |         |         |    |
| 2000     | 13    |                |         |         |         |         |         |         |         |         |    |
| 2001     | 12    |                |         |         |         |         |         |         |         |         |    |
| 2002     | 11    |                |         |         |         |         |         |         |         |         |    |
| 2003     | 10    |                |         |         |         |         |         |         |         |         |    |
| 2004     | 9     |                |         |         |         |         |         |         |         |         |    |
| 2005     | 8     |                |         |         |         |         |         |         |         |         |    |
| 2006     | 7     |                |         |         |         |         |         |         |         |         |    |
| 2007     | 6     |                |         |         |         |         |         |         |         |         |    |
| 2008     | 5     |                |         |         |         |         |         |         |         |         |    |
| 2009     | 4     |                |         |         |         |         |         |         |         |         |    |
| 2010     | 3     |                |         |         |         |         |         |         |         |         |    |
| 2011     | 2     |                |         |         |         |         |         |         |         |         |    |
| 2012     | 1     |                |         |         |         |         |         |         |         |         |    |
| 2013     | 0     |                |         |         |         |         |         |         |         |         |    |
| Age (DC) |       | __             | __      | __      | __      | __      | __      | __      | __      | __      | __ |

**ENQUETEUR : IDENTIFIER LES DÉCÈS AYANT EU LIEU A UN ÂGE > A 12 ANS PUIS INSCRIRE LES NOMS ET NUMÉROS DES PERSONNES DÉCÉDÉ(E)S. ENFIN POSER LES QUESTIONS SUIVANTES.**

|                                                                                                                                                                                 | Prénom/Nom                                                                                                     | _____                      |      | _____                      |      | _____                      |      | _____                      |      | _____                      |      |     |
|---------------------------------------------------------------------------------------------------------------------------------------------------------------------------------|----------------------------------------------------------------------------------------------------------------|----------------------------|------|----------------------------|------|----------------------------|------|----------------------------|------|----------------------------|------|-----|
|                                                                                                                                                                                 |                                                                                                                | _____                      |      | _____                      |      | _____                      |      | _____                      |      | _____                      |      |     |
|                                                                                                                                                                                 | Numéro                                                                                                         | ____                       | ____ | ____                       | ____ | ____                       | ____ | ____                       | ____ | ____                       | ____ |     |
| Sexe                                                                                                                                                                            | M                                                                                                              | F                          | NSP  | M                          | F    | NSP                        | M    | F                          | NSP  | M                          | F    | NSP |
| <b>!!! NOTE POUR L'ENQUETEUR, LES QUESTIONS 210-213 CI-DESSOUS NE SONT À POSER QUE POUR LES FEMMES DECEDEES. POUR UN DECES D'HOMME, PASSER AUX QUESTIONS 214 IMMEDIATEMENT.</b> |                                                                                                                |                            |      |                            |      |                            |      |                            |      |                            |      |     |
| 210                                                                                                                                                                             | Est-ce que (NOM) était enceinte au moment du décès ?                                                           | 1 = oui (→ 213)<br>2 = non |      | 1 = oui (→ 213)<br>2 = non |      | 1 = oui (→ 213)<br>2 = non |      | 1 = oui (→ 213)<br>2 = non |      | 1 = oui (→ 213)<br>2 = non |      |     |
| 211                                                                                                                                                                             | Est-ce que (NOM) est décédée au cours d'un accouchement ?                                                      | 1 = oui (→ 213)<br>2 = non |      | 1 = oui (→ 213)<br>2 = non |      | 1 = oui (→ 213)<br>2 = non |      | 1 = oui (→ 213)<br>2 = non |      | 1 = oui (→ 213)<br>2 = non |      |     |
| 212a                                                                                                                                                                            | Est-ce que (NOM) est décédée dans les <b>42 jours</b> suivant un la fin d'une grossesse ou d'un accouchement ? | 1 = oui (→ 213)<br>2 = non |      | 1 = oui (→ 213)<br>2 = non |      | 1 = oui (→ 213)<br>2 = non |      | 1 = oui (→ 213)<br>2 = non |      | 1 = oui (→ 213)<br>2 = non |      |     |
| 212b                                                                                                                                                                            | Est-ce que (NOM) est décédée dans les <b>12 mois</b> suivant la fin d'une grossesse ou d'un accouchement ?     | 1 = oui<br>2 = non         |      | 1 = oui<br>2 = non         |      | 1 = oui<br>2 = non         |      | 1 = oui<br>2 = non         |      | 1 = oui<br>2 = non         |      |     |
| 213                                                                                                                                                                             | A combien d'enfants vivants est-ce que (NOM) a donné naissance au cours de sa vie?                             | ____                       |      | ____                       |      | ____                       |      | ____                       |      | ____                       |      |     |
| <b>!!! NOTE POUR L'ENQUETEUR : LES QUESTIONS 214A, 214B, 214C CI-DESSOUS SONT A POSER A PROPOS DE TOUS LES DECES A AGE &gt; 12 ANS. PAS SEULEMENT LES DECES DE FEMMES</b>       |                                                                                                                |                            |      |                            |      |                            |      |                            |      |                            |      |     |
| 214b                                                                                                                                                                            | Est-ce que (NOM) est décédé(e) suite a une blessure ?                                                          | 1 = oui<br>2 = non         |      | 1 = oui<br>2 = non         |      | 1 = oui<br>2 = non         |      | 1 = oui<br>2 = non         |      | 1 = oui<br>2 = non         |      |     |
| 214c                                                                                                                                                                            | Etait-ce du a un(e) :<br><i>Si suicide, passer au décès suivant</i>                                            | Accident                   | 1    | Accident                   | 1    | Accident                   | 1    | Accident                   | 1    | Accident                   | 1    |     |
|                                                                                                                                                                                 |                                                                                                                | Suicide                    | 2    | Suicide                    | 2    | Suicide                    | 2    | Suicide                    | 2    | Suicide                    | 2    |     |
|                                                                                                                                                                                 |                                                                                                                | Homicide                   | 3    | Homicide                   | 3    | Homicide                   | 3    | Homicide                   | 3    | Homicide                   | 3    |     |
|                                                                                                                                                                                 |                                                                                                                | Guerre                     | 4    | Guerre                     | 4    | Guerre                     | 4    | Guerre                     | 4    | Guerre                     | 4    |     |
|                                                                                                                                                                                 |                                                                                                                | Cata. Nature               | 5    | Cata. Naturelle            | 5    | Cata. Nature               | 5    | Cata. Nature               | 5    | Cata. Nature               | 5    |     |
| 214d                                                                                                                                                                            | Donner le détail des événements qui ont conduit a la blessure ?                                                | Véhicule à moteur          | 1    | Véhicule à moteur          | 1    | Véhicule à moteur          | 1    | Véhicule à moteur          | 1    | Véhicule à moteur          | 1    |     |
|                                                                                                                                                                                 |                                                                                                                | Accident piéton/vehic.     | 2    | Accident piéton/vehic.     | 2    | Accident piéton/vehic.     | 2    | Accident piéton/vehic.     | 2    | Accident piéton/vehic.     | 2    |     |
|                                                                                                                                                                                 |                                                                                                                | Moto                       | 3    | Moto                       | 3    | Moto                       | 3    | Moto                       | 3    | Moto                       | 3    |     |
|                                                                                                                                                                                 |                                                                                                                | Vélo                       | 4    | Vélo                       | 4    | Vélo                       | 4    | Vélo                       | 4    | Vélo                       | 4    |     |
|                                                                                                                                                                                 |                                                                                                                | Chute                      | 5    | Chute                      | 5    | Chute                      | 5    | Chute                      | 5    | Chute                      | 5    |     |
|                                                                                                                                                                                 |                                                                                                                | Arme à feu                 | 6    | Arme à feu                 | 6    | Arme à feu                 | 6    | Arme à feu                 | 6    | Arme à feu                 | 6    |     |
|                                                                                                                                                                                 |                                                                                                                | Mine / bombe               | 7    | Mine / bombe               | 7    | Mine / bombe               | 7    | Mine / bombe               | 7    | Mine / bombe               | 7    |     |
|                                                                                                                                                                                 |                                                                                                                | Arme blanche               | 8    | Arme blanche               | 8    | Arme blanche               | 8    | Arme blanche               | 8    | Arme blanche               | 8    |     |
|                                                                                                                                                                                 |                                                                                                                | Incendie                   | 9    | Incendie                   | 9    | Incendie                   | 9    | Incendie                   | 9    | Incendie                   | 9    |     |
|                                                                                                                                                                                 |                                                                                                                | Poison                     | 10   | Poison                     | 10   | Poison                     | 10   | Poison                     | 10   | Poison                     | 10   |     |
|                                                                                                                                                                                 |                                                                                                                | noyade                     | 11   | noyade                     | 11   | noyade                     | 11   | noyade                     | 11   | noyade                     | 11   |     |
|                                                                                                                                                                                 |                                                                                                                | Autre blessure             | 12   | Autre blessure             | 12   | Autre blessure             | 12   | Autre blessure             | 12   | Autre blessure             | 12   |     |
